# Supplementary material
Source: PubMed Central journal article supplement (PMC3072839)

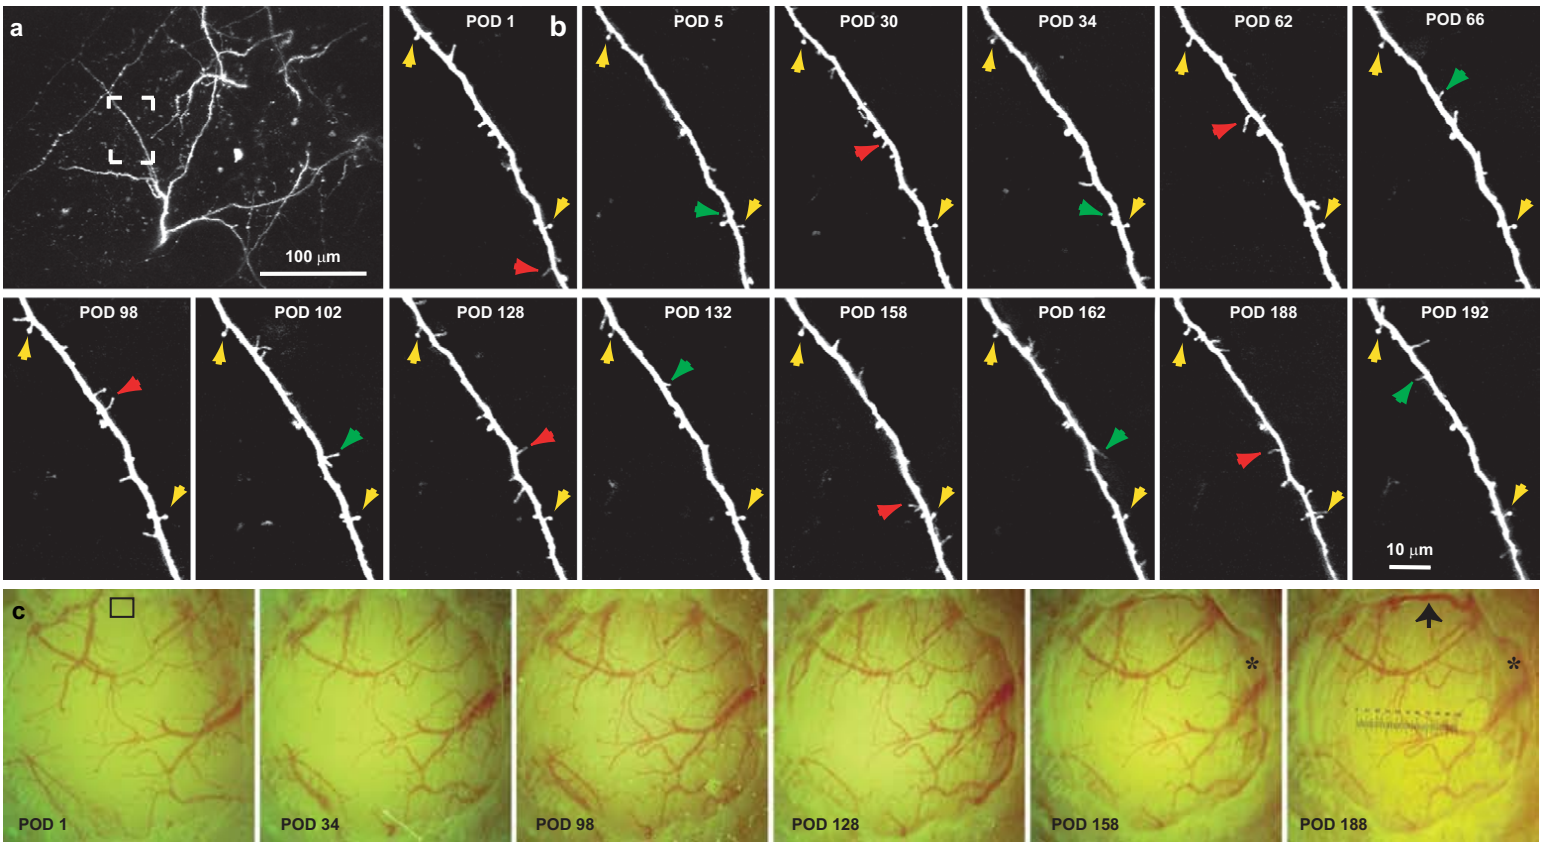

Supplementary Figure 1

Supplement: NIHMS226338-supplement-supp__figure_1.pdf [file NIHMS226338-supplement-supp__figure_1.pdf]

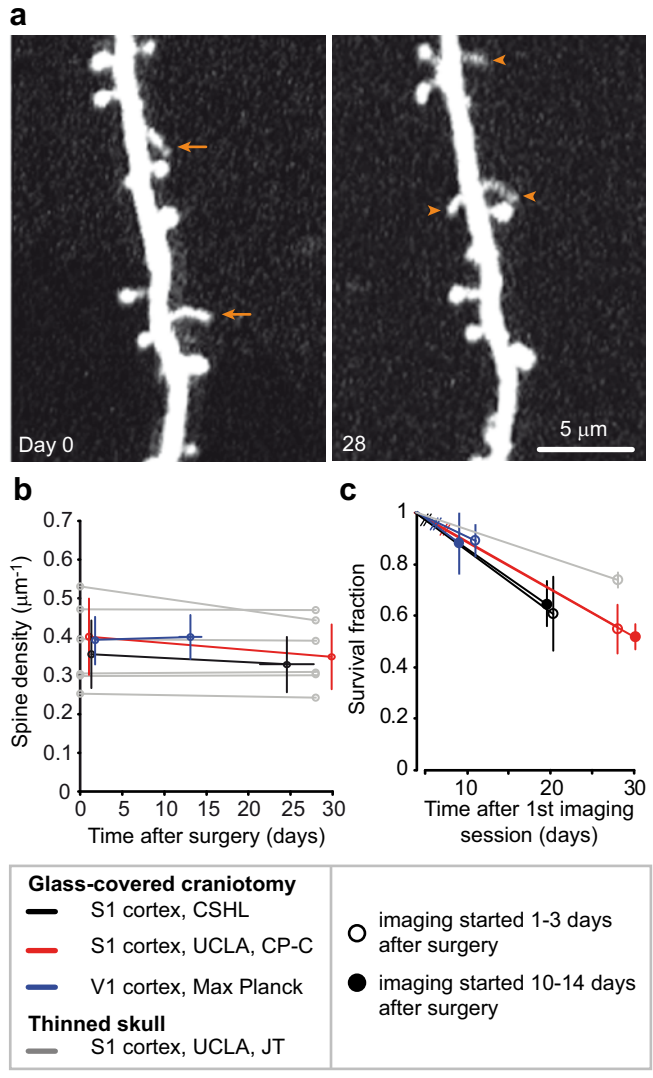

Supplementary Figure 2

Supplement: NIHMS226338-supplement-supp__figure_2.pdf [file NIHMS226338-supplement-supp__figure_2.pdf]
